# Supplementary material
Source: PubMed Central journal article supplement (PMC7860624)
Supplement: NIHMS1607521-supplement-1.pdf [file NIHMS1607521-supplement-1.pdf]

## **Supplemental Methods**

### **National Inpatient Sample**

The National Inpatient Sample (NIS) is an inpatient database in the US<sup>1</sup> developed by the Agency for Healthcare Research and Quality (AHRQ). It is comprised of a 20% nationwide sample of all inpatient discharges from US hospitals, excluding patients admitted for observation status, short-term rehabilitation hospitals, long-term non-acute care hospitals, psychiatric hospitals, and alcohol or chemical dependency units. This dataset contains de-identified information regarding each hospitalization, including demographic characteristics, co-morbidities, discharge diagnoses, procedures, outcomes, and total cost of the admission. The design of the NIS changed twice during the study<sup>2</sup>. Between 2003 and 2011, the NIS comprised all inpatient discharges from a 20% nationwide random sample of acute-care hospitals in the US. However, in 2012, instead of including all discharges from the 20% nationwide sample, the database was constructed using a systematic sampling of 20% of discharges from the hospitals stratified by hospital, census division, ownership status, location, teaching status, and bed size, as well as patient diagnosis-related group and admission month. To facilitate patient-level trend analysis, a new set of weights called “trendwt” was developed for data from previous years (1993-2011)<sup>1,3</sup>. The trend weights replaced the original NIS discharge weights for trend. We used trend weights for all patient and hospital level analyses<sup>3</sup>. In 2015, NIS moved to the International Classification of Diseases, Tenth Revision, Clinical Modification (ICD-10-CM) format of data collection, and hence, data was available only through September 2015<sup>4</sup>. Data collection methodology was unchanged compared to 2012.

### **Propensity Model**

The propensity score was calculated using Parson’s 8@1 Digit Match algorithm (DGM)<sup>5</sup>. This algorithm matches a case to control at the 8th, 7th, 6th ... decimal point, using a greedy matching algorithm. This methodology requires one to measure the closeness of match by performing univariable statistics across the matching variable. This data is presented in supplemental table 2 below. As far

as the technique of matching is considered, this technique was compared to Mayo Clinic Caliper matching<sup>6</sup>. The closeness of match using these two techniques are shown in the following table:

| <b>Variable</b>                  | <b>Parson's DGM</b> | <b>Caliper Match using Mayo Clinic Algorithm</b> |
|----------------------------------|---------------------|--------------------------------------------------|
| ≥ 65 years                       | .64                 | .81                                              |
| Women                            | .60                 | <.001                                            |
| Race                             | .02                 | .06                                              |
| Income quartiles                 | .60                 | .71                                              |
| Payment source                   | .29                 | .57                                              |
| <b>Comorbidities</b>             |                     |                                                  |
| Atrial Fibrillation              | .12                 | .18                                              |
| Hypertension                     | .02                 | .03                                              |
| Diabetes                         | .59                 | .48                                              |
| Anemia                           | .17                 | .33                                              |
| Chronic renal disease            | .86                 | .34                                              |
| Coagulation disorder             | .38                 | .27                                              |
| Total Elixhauser's comorbidities | .84                 | .83                                              |
| Bed size                         | .98                 | .82                                              |
| Geographic region                | .32                 | .63                                              |
| Discharge weight                 | .64                 | .78                                              |

Since we see that both methods give reasonable match, we decided to keep the DGM methodology.

**Supplemental Figure 1A** Flow chart showing inclusion and exclusion criteria for tables and figures used in the manuscript.

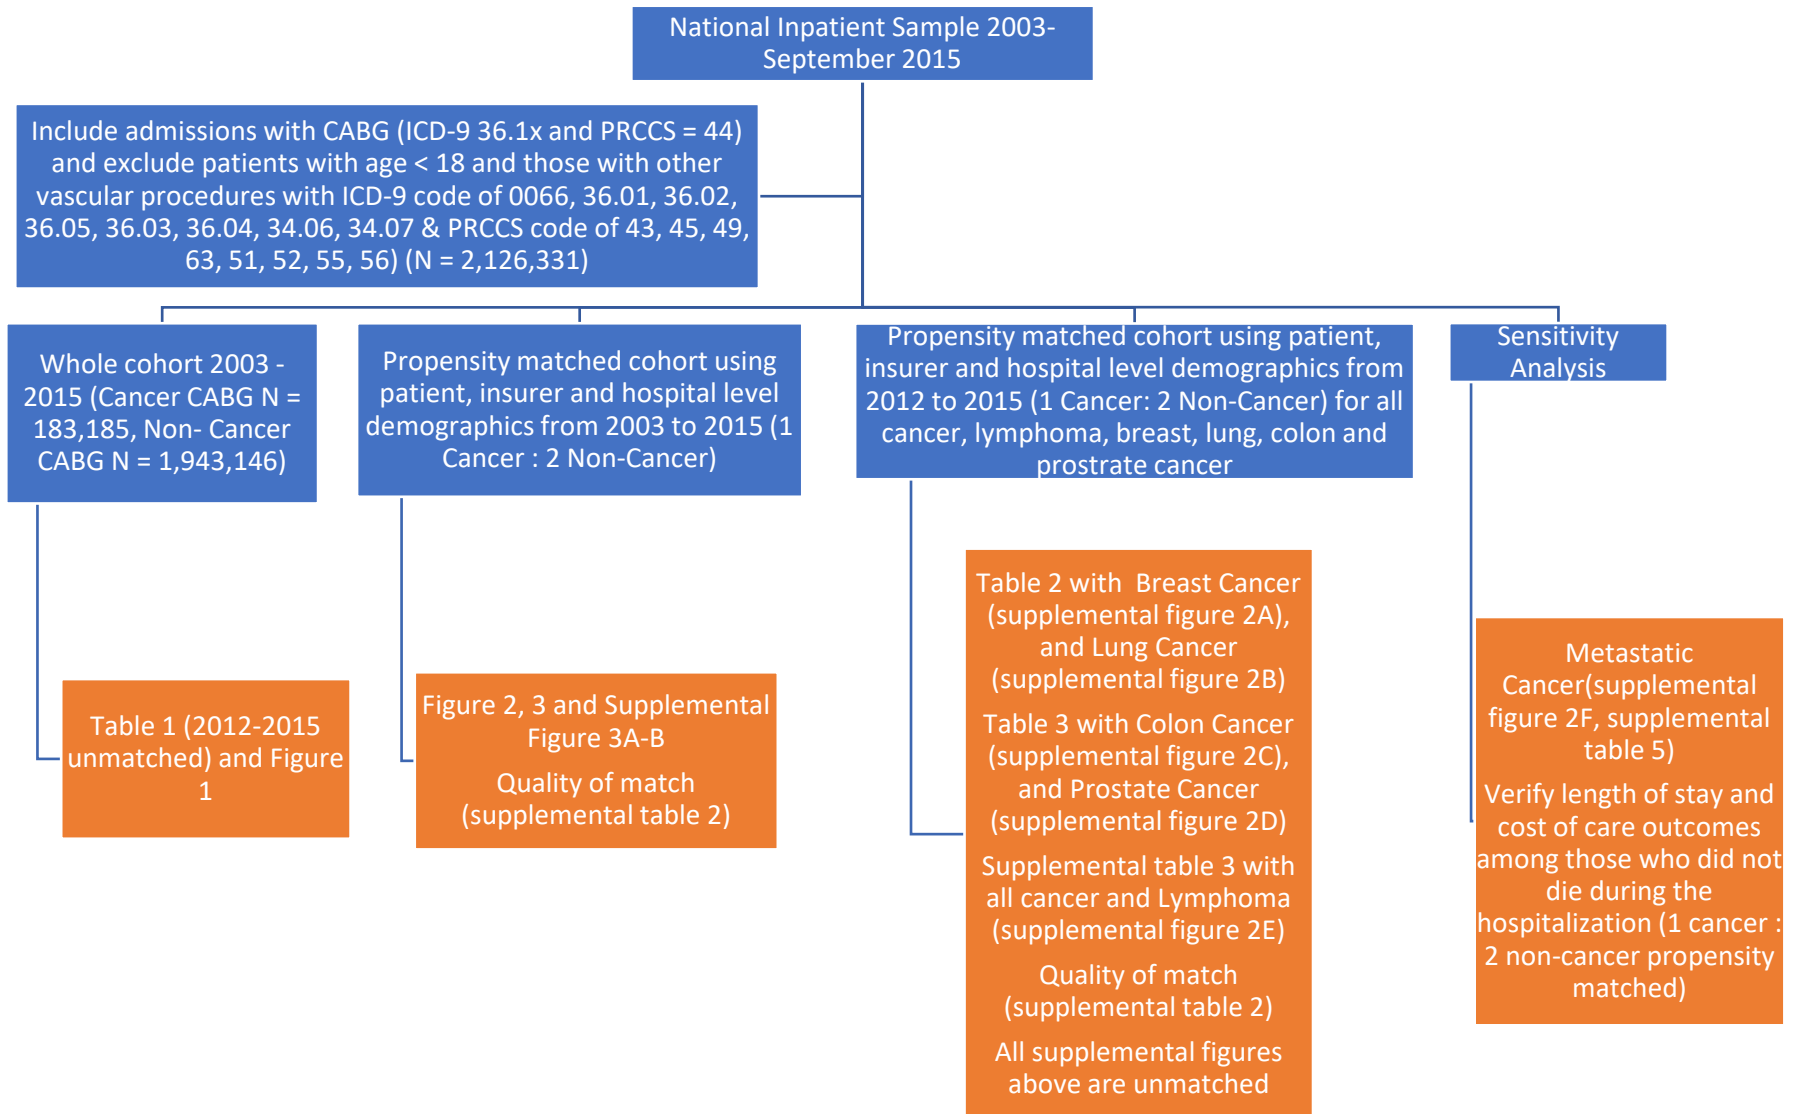

Supplemental Figure 1B Type of cancers and their prevalence.

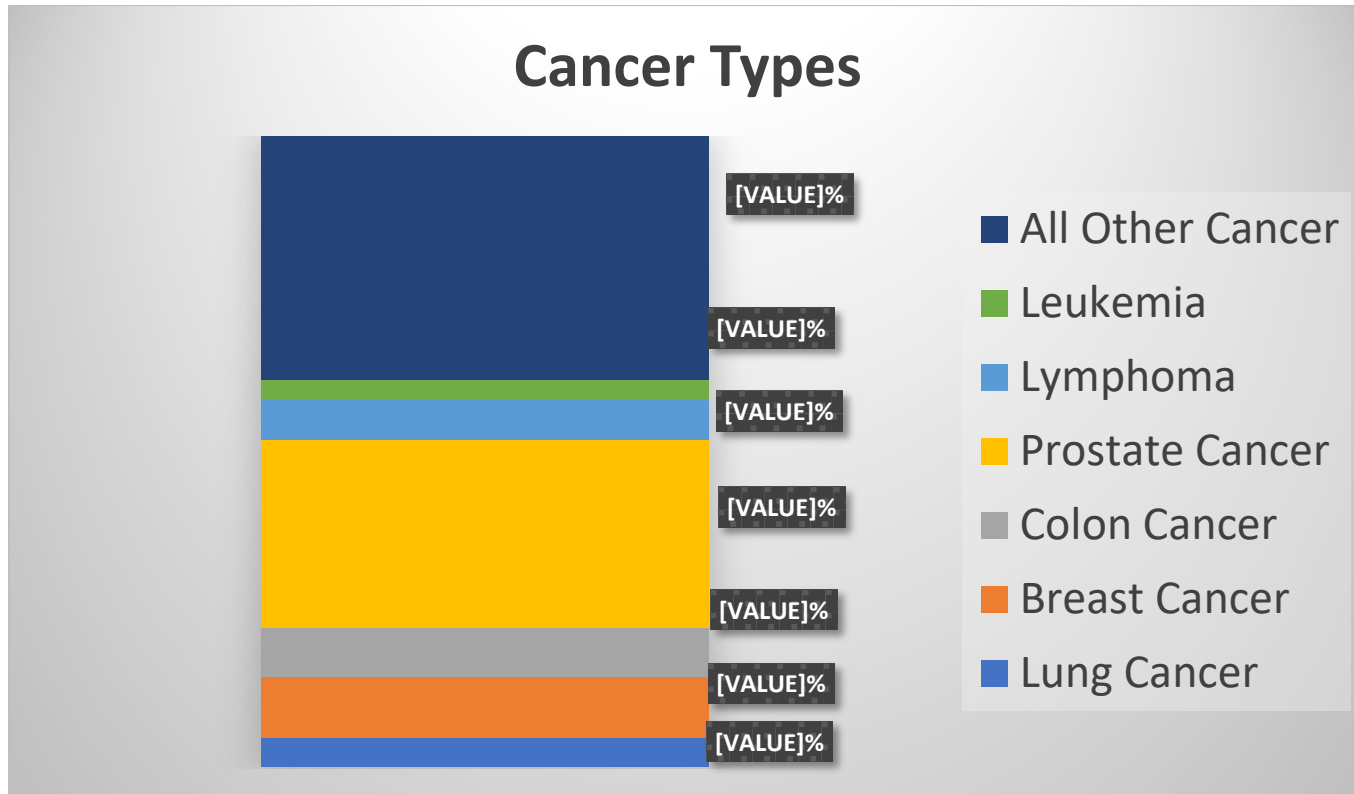

**Supplemental Figure 2A** Trends in coronary artery bypass graft utilizations in breast cancer vs non-cancer patients from 2003-2015.

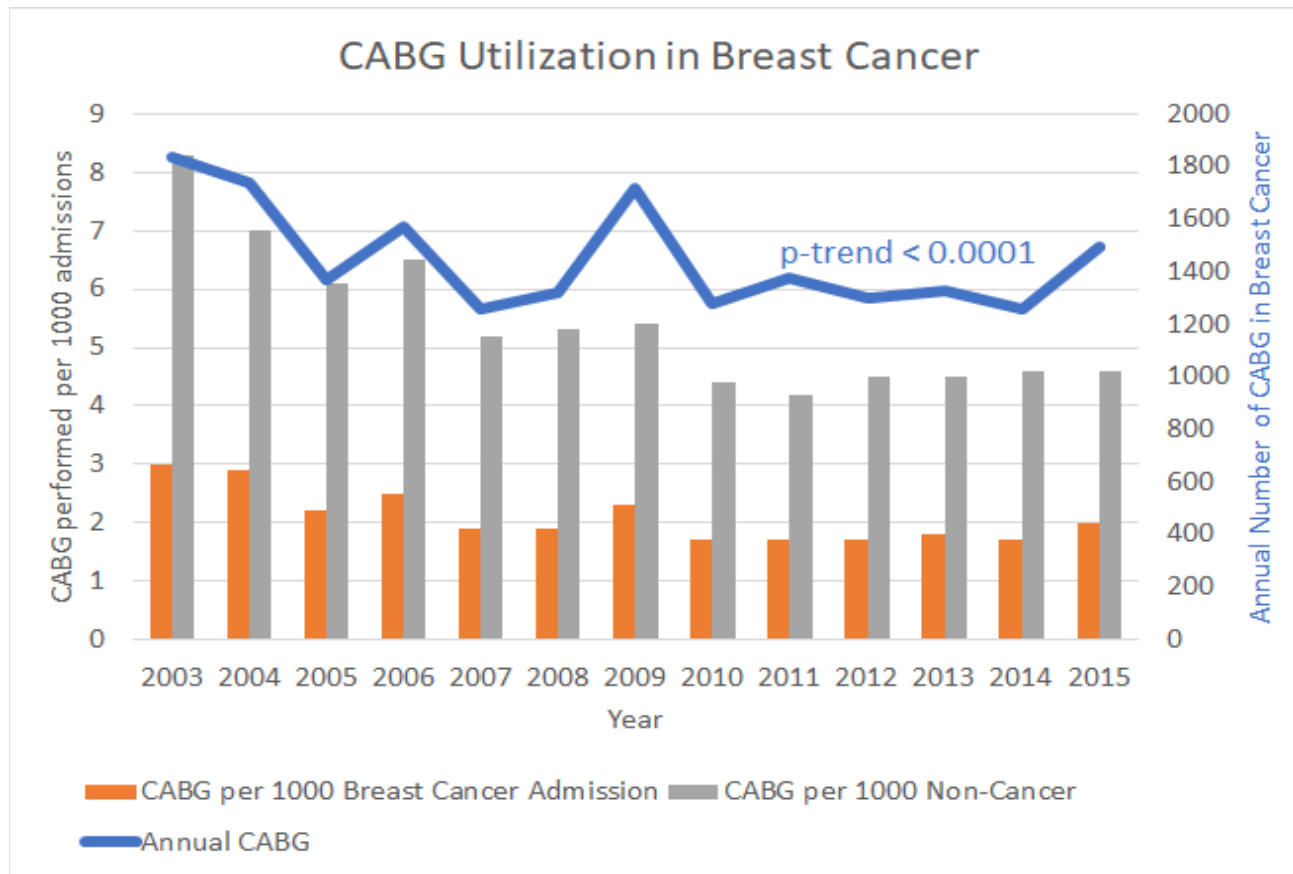

**Supplemental Figure 2B** Trends in coronary artery bypass graft utilizations in lung cancer vs non-cancer patients from 2003-2015.

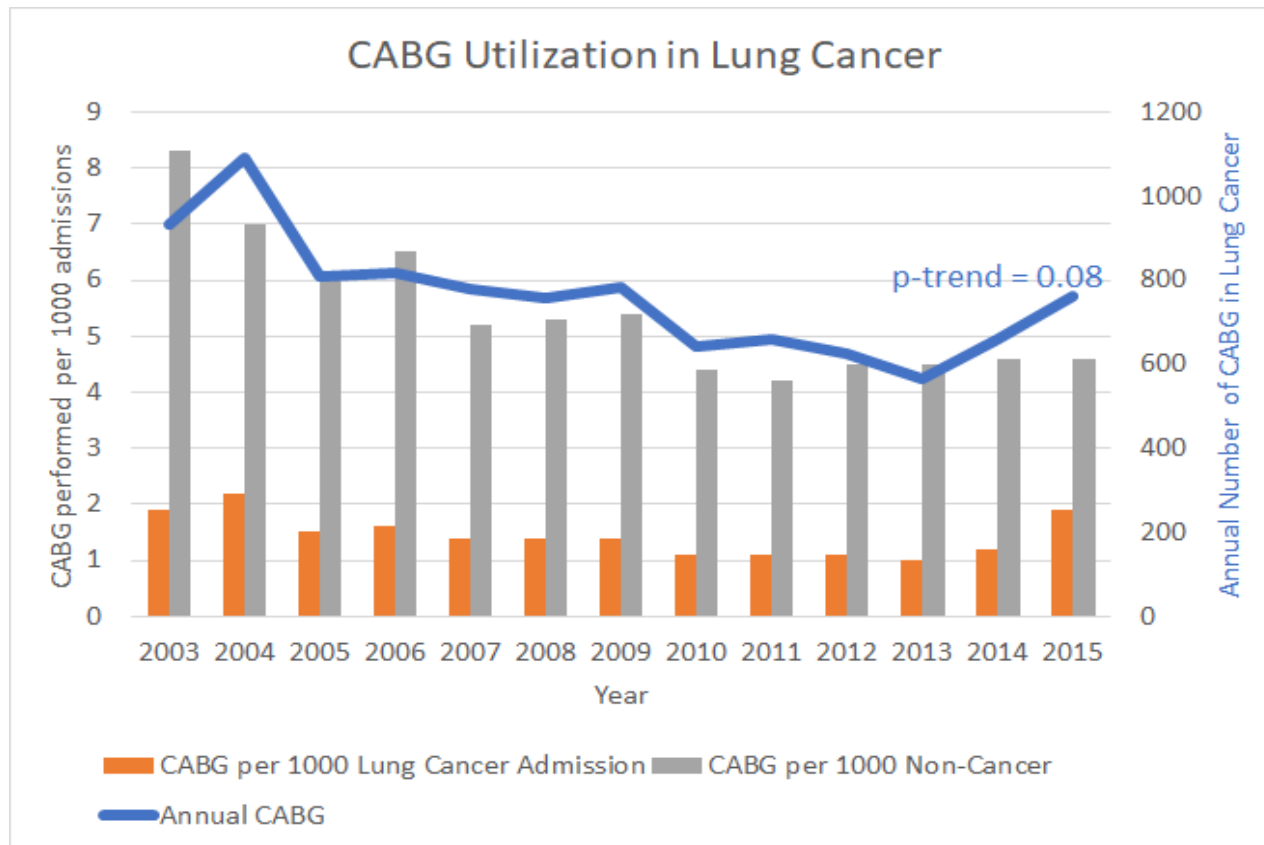

**Supplemental Figure 2C** Trends in coronary artery bypass graft utilizations in colon cancer vs non-cancer patients from 2003-2015.

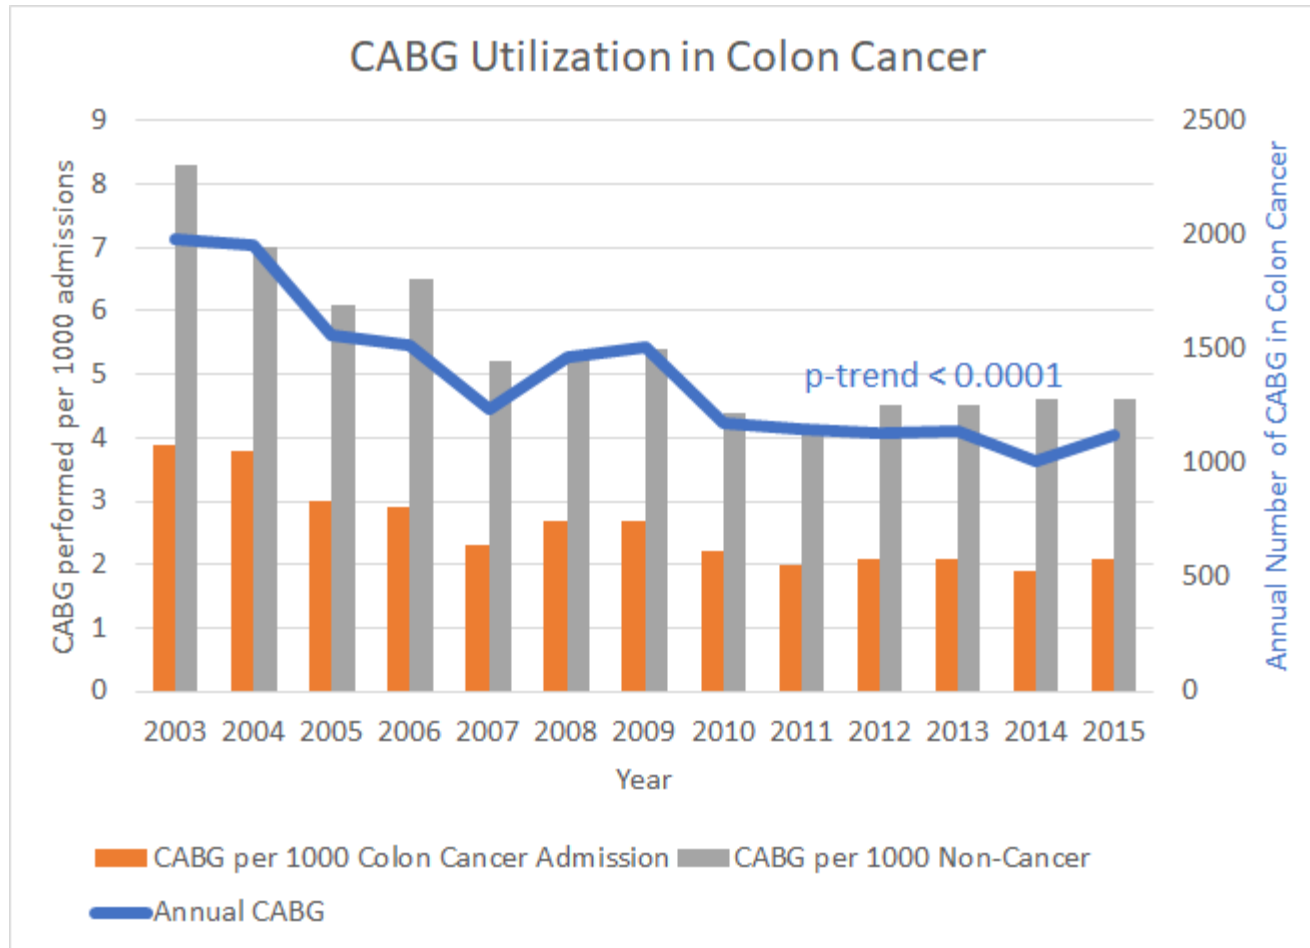

**Supplemental Figure 2D** Trends in coronary artery bypass graft utilizations in prostate cancer vs non-cancer patients from 2003-2015.

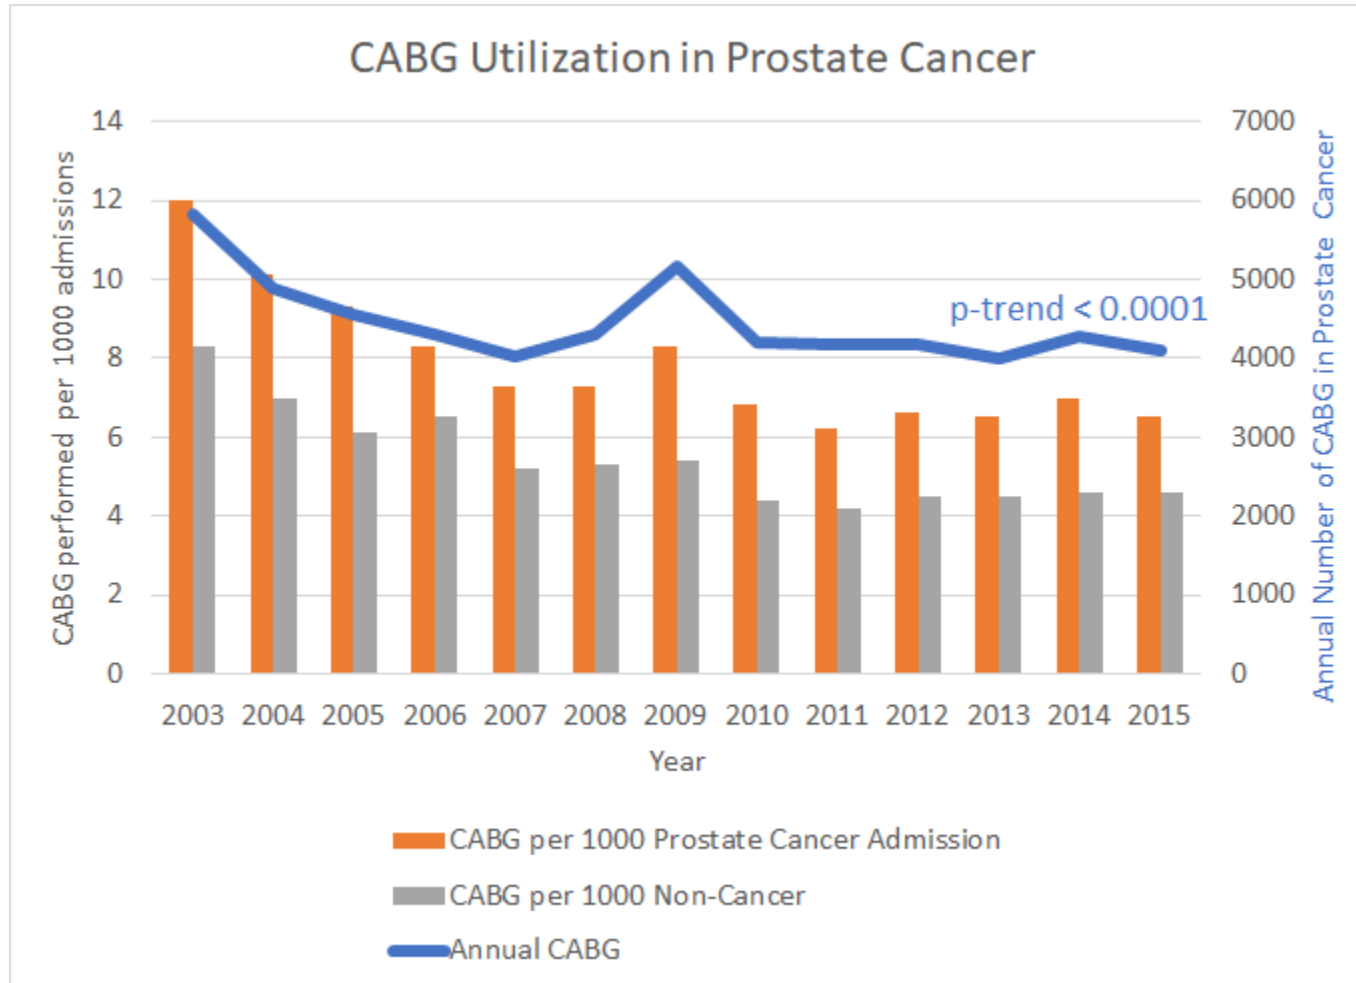



**Supplemental Figure 2E** Trends in coronary artery bypass graft utilizations in lymphoma vs non-cancer patients from 2003-2015.

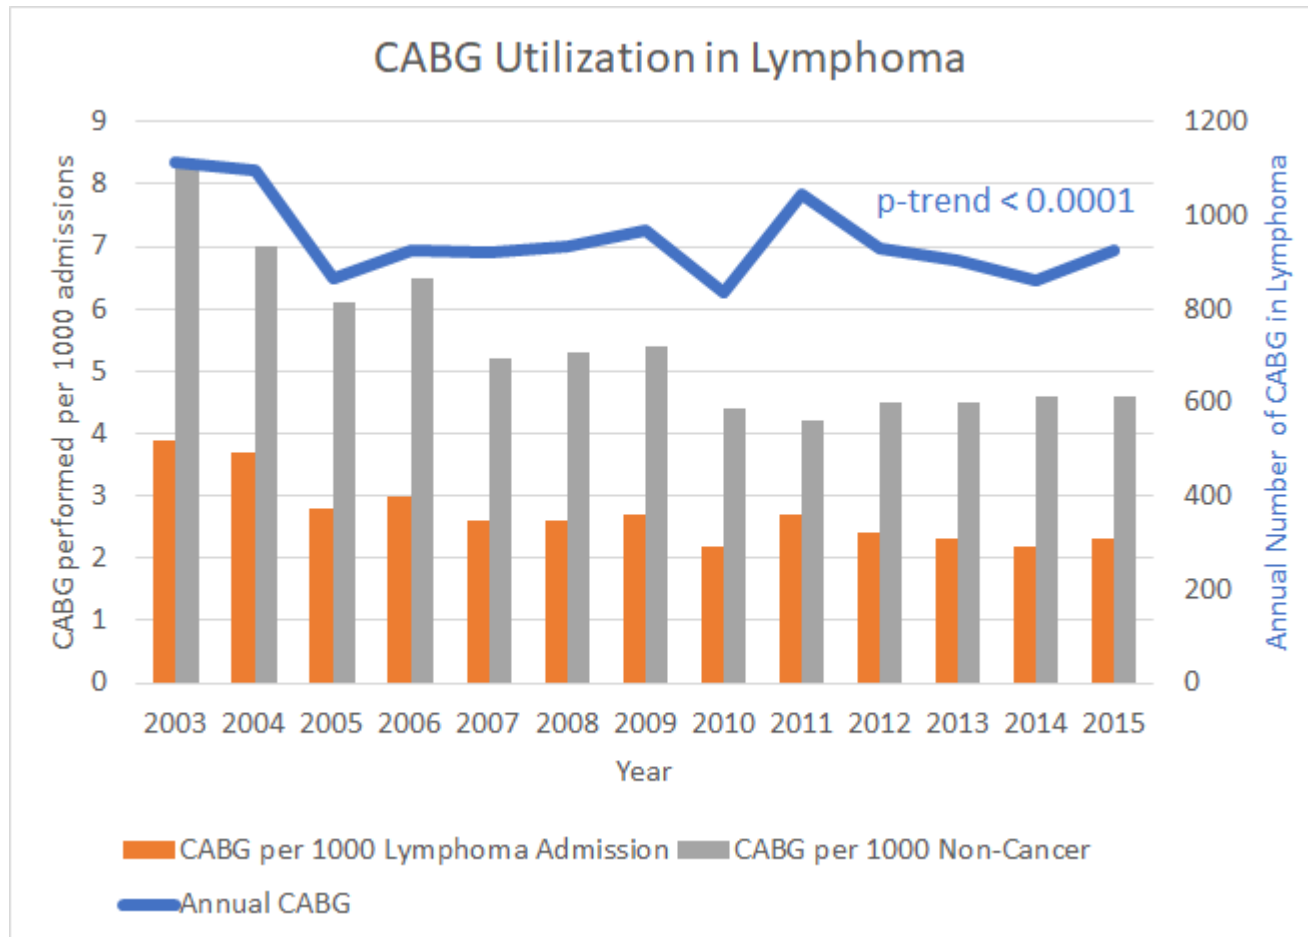

**Supplemental Figure 2F** Trends in coronary artery bypass graft utilizations in metastatic cancer vs non-cancer patients from 2003-2015.

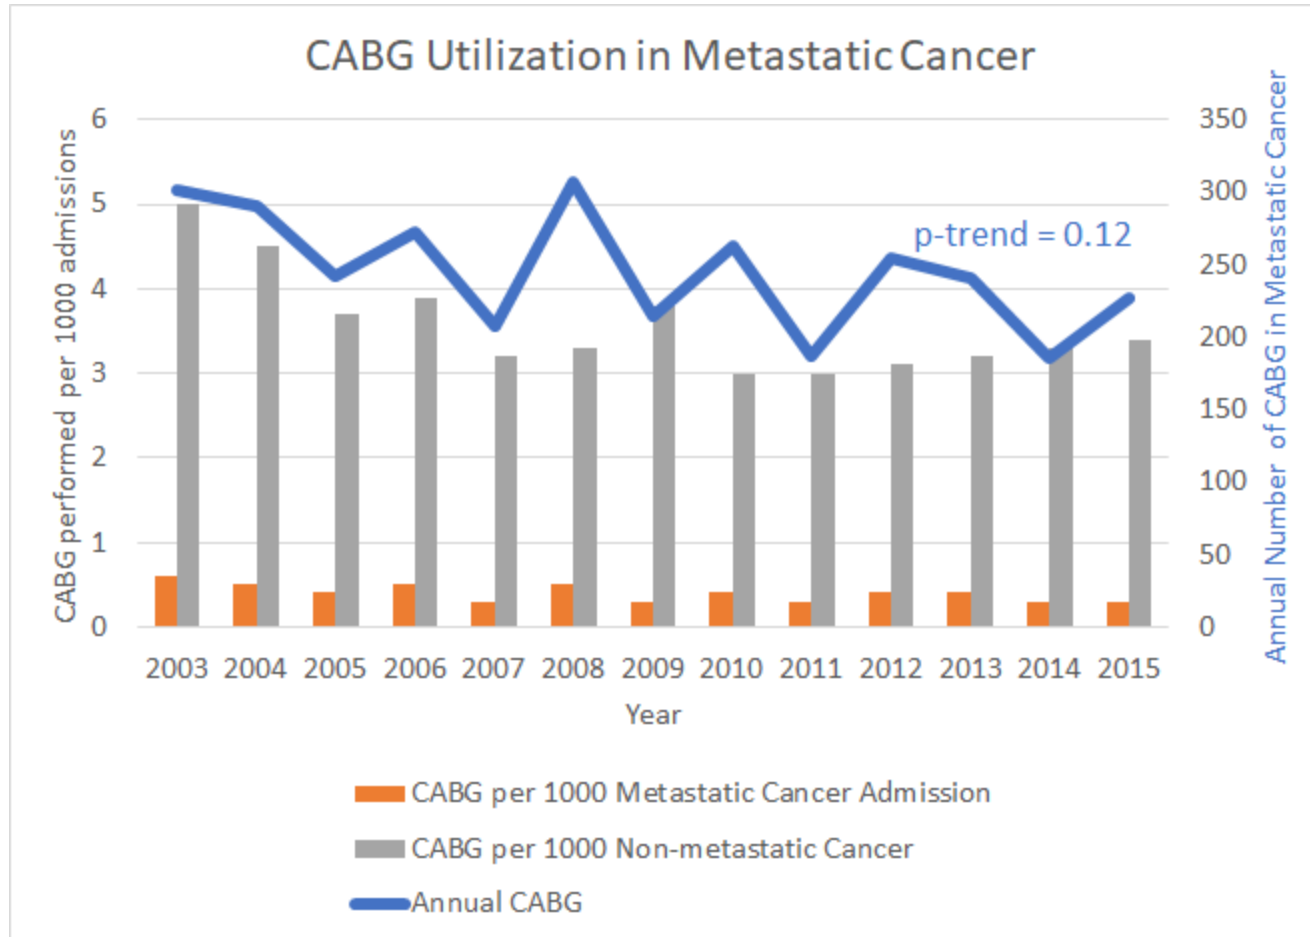

**Supplemental Figure 3A** Trends in stroke rate associated with coronary artery bypass graft utilizations in cancer and non-cancer patients from 2003-2015.

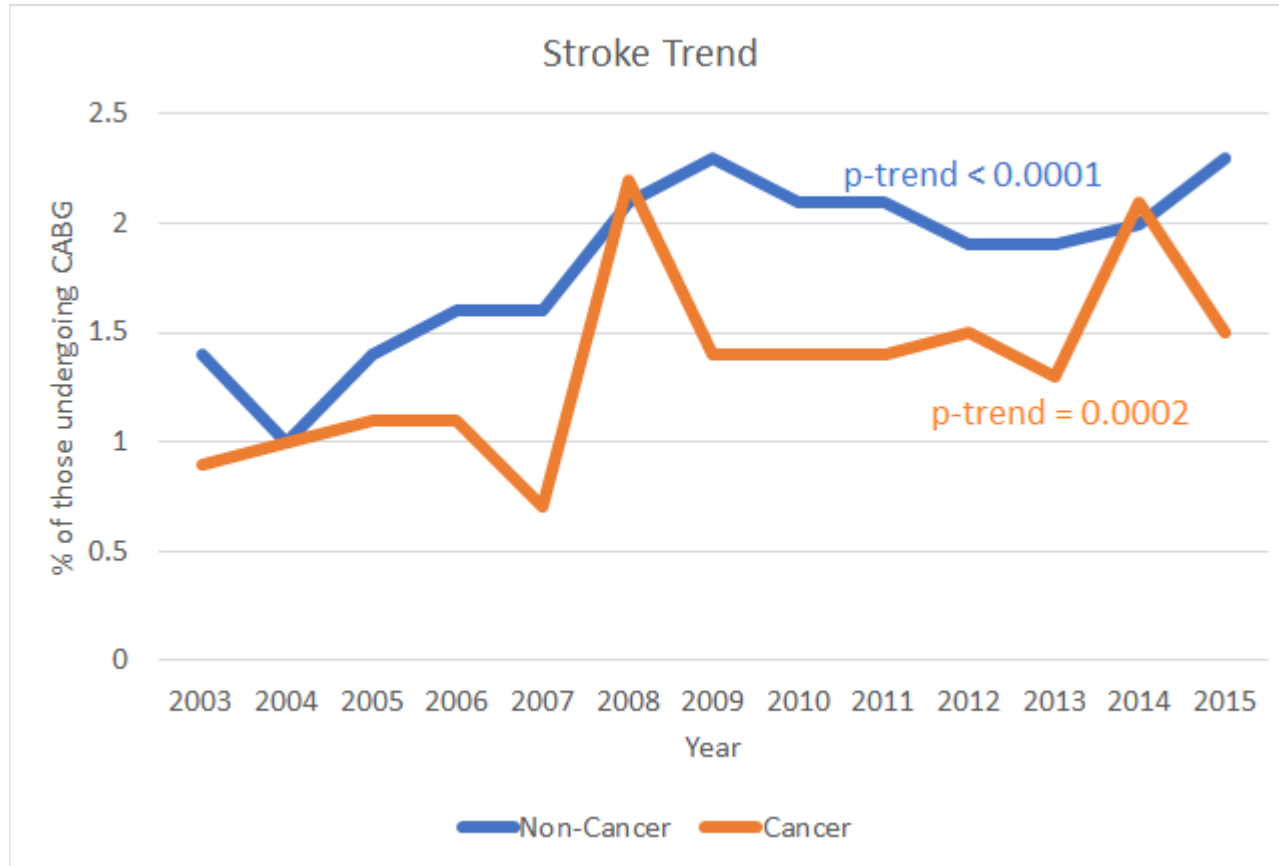

**Supplemental Figure 3B** Trends in annual median cost of care associated with coronary artery bypass graft utilizations in cancer and non-cancer patients from 2003-2015.

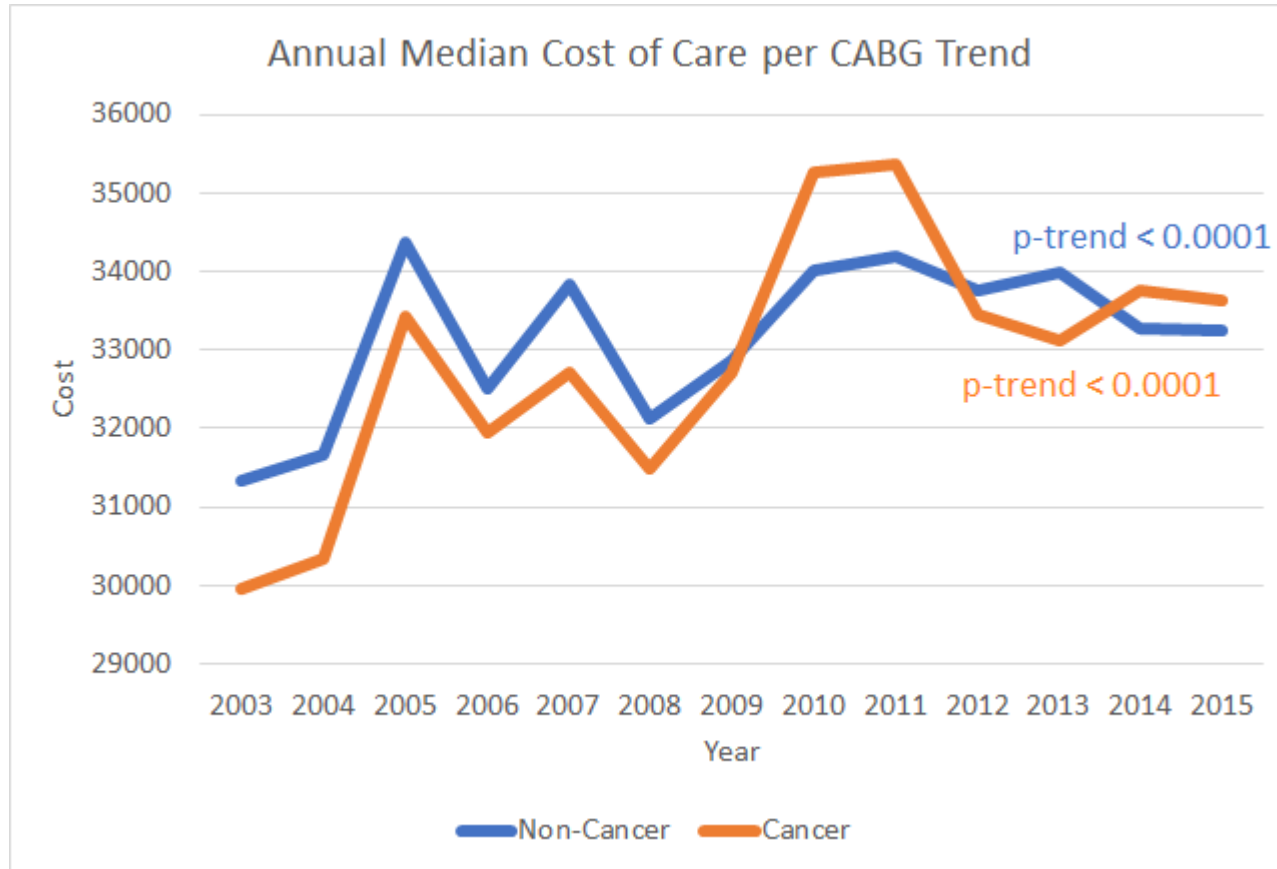

**Supplemental Table 1:** Diagnosis codes used in the study

|                               | <b>ICD-9 code</b>                                                                                                                                                             | <b>CCS code</b>                                                                                                              | <b>Comorbidity field from NIS</b> |
|-------------------------------|-------------------------------------------------------------------------------------------------------------------------------------------------------------------------------|------------------------------------------------------------------------------------------------------------------------------|-----------------------------------|
| <b>Cohort Creation</b>        |                                                                                                                                                                               |                                                                                                                              |                                   |
| Cancer                        | 162.xx,174.xx,175.xx,153.xx,154.xx,185.xx,<br>,182.xx,183.xx,188.xx,189.xx,200.xx,201.x<br>x,202.xx,204.xx,205.xx,206.xx,207.xx,208.<br>xx,155.xx,156.xx,172.xx,193.xx,157.xx | 11,12,13,14,15,16,1<br>7,18,19,20,21,22,23,<br>24,25,26,27,28,29,3<br>0,31,32,33,34,35,36,<br>37,38,39,40,41,42,4<br>3,44,45 | CM_LYMPH,CM_TU<br>MOR<br>CM_METS  |
| Metastatic Cancer             |                                                                                                                                                                               |                                                                                                                              | CM_METS                           |
| <b>Comorbidities</b>          |                                                                                                                                                                               |                                                                                                                              |                                   |
| Cardiomyopathy                | 425.xx                                                                                                                                                                        |                                                                                                                              | CM_CHF                            |
| Known Coronary Artery Disease | 414.00, 414.01, 414.02, 414.03, 414.04,<br>414.05, 414.06, 414.07                                                                                                             |                                                                                                                              |                                   |
| Prior Myocardial Infarction   | 412.xx                                                                                                                                                                        |                                                                                                                              |                                   |

|                                          |                |       |               |
|------------------------------------------|----------------|-------|---------------|
| Prior Percutaneous Coronary Intervention | V45.82         |       |               |
| Prior Coronary Bypass Grafting           | V45.81         |       |               |
| Carotid Disease                          | 433.10         |       |               |
| Prior TIA/Stroke                         | 438.xx,V12.54  |       |               |
| Atrial Fibrillation                      | 427.31         |       |               |
| Hypertension                             |                | 98,99 | CM_HTN_C      |
| Diabetes                                 |                | 49,50 | CM_DX,CM_DMCX |
| Obesity                                  | 278.xx         |       | CM_OBESE      |
| Chronic Kidney Disease                   |                | 158   | CM_RENLFAIL   |
| Hyperlipidemia                           |                | 53    |               |
| Peripheral Vascular Disease              |                | 114   | CM_PERIVASC   |
| Smoking                                  | 305.1x, V158.2 |       |               |
| Weight Loss                              |                |       | CM_WGHTLOSS   |
| Anemia                                   |                |       | CM_ANEMDEF,   |

|                                            |                               |     |                       |
|--------------------------------------------|-------------------------------|-----|-----------------------|
|                                            |                               |     | CM_BLDLOSS            |
| Arthritis and Collagen<br>Vascular disease |                               |     | CM_ARTH               |
| Chronic liver disease                      |                               |     | CM_LIVER              |
| Chronic renal disease                      |                               | 158 | CM_RENLFAIL           |
| Chronic lung disease                       |                               |     | CM_CHRNLUNG           |
| Hypothyroidism                             |                               |     | CM_HYPOTHY            |
| Neurologic                                 |                               |     | CM_NEURO,<br>CM_PARA  |
| Psychiatric                                |                               |     | CM_DEPRESS            |
| Fluid/electrolyte disorder                 |                               |     | CM_LYTES              |
| Coagulation disorder                       |                               |     | CM_COAG               |
| Substance abuse                            |                               |     | CM_ALCOHOL<br>CM_DRUG |
| Radiation Therapy                          | E926.xx, 909.2, 990.xx, V15.3 |     |                       |
| <b>In-Hospital Complications</b>           |                               |     |                       |

|                                      |                                                                                                                                                                                                                    |  |  |
|--------------------------------------|--------------------------------------------------------------------------------------------------------------------------------------------------------------------------------------------------------------------|--|--|
| Stroke                               | 431.xx, 435.0x, 435.1x, 435.2x, 435.3x,<br>435.8x, 435.9x, 433.01, 433.11, 433.21,<br>433.31, 433.81, 433.91, 434.01, 434.11,<br>434.91, 997.01, 344.60, 344.61                                                    |  |  |
| Pulmonary embolism                   | 415.1x                                                                                                                                                                                                             |  |  |
| Pneumonia                            | 481.xx, 482.xx, 483.xx, 484.xx, 485.xx,<br>486.xx, 487.xx, 507.xx                                                                                                                                                  |  |  |
| Iatrogenic respiratory complications | 997.3                                                                                                                                                                                                              |  |  |
| Pneumothorax                         | 512.1                                                                                                                                                                                                              |  |  |
| Thoracic complications               | Any of the prior 4 rows of complication                                                                                                                                                                            |  |  |
| Gastrointestinal bleed               | 578.xx, 456.0x, 531.0, 531.2x, 531.4x,<br>531.6x, 532.0x, 532.2, 532.4x, 532.6x,<br>533.0x, 533.2x, 533.4x, 533.6x, 534.0x,<br>534.2x, 534.4x, 534.6x, 569.3x, 456.20 ,<br>530.82, 535.01, 535.11, 535.21, 535.31, |  |  |



|                                         |                                                                                                                                                                                                                                                                                 |  |  |
|-----------------------------------------|---------------------------------------------------------------------------------------------------------------------------------------------------------------------------------------------------------------------------------------------------------------------------------|--|--|
|                                         | 535.41, 535.51, 535.61, 537.83, 562.02,<br>562.03, 562.12, 562.13, 568.81, 569.85                                                                                                                                                                                               |  |  |
| Endoscopy for<br>gastrointestinal bleed | 44.43                                                                                                                                                                                                                                                                           |  |  |
| Blood Transfusion                       | 99.00, 99.01, 99.02, 99.03, 99.04                                                                                                                                                                                                                                               |  |  |
| Other bleeding                          | 360.43, 362.43, 362.81, 363.61, 363.62,<br>363.72, 364.41, 372.72, 374.81, 376.32,<br>377.42, 379.23, 997.02, 998.11 285.1x,<br>423.0x, 596.7x, 599.7x, 602.1x, 620.1x,<br>621.4x, 626.2x, 626.5x, 626.7x, 626.8x,<br>626.9x, 719.1x, 782.7x, 784.7x, 784.8x,<br>786.3x, 958.2x |  |  |
| Major bleeding                          | Gastrointestinal bleeding requiring<br>endoscopy or any bleeding requiring<br>transfusion or cerebral bleed (430.xx,<br>431.xx, 432.0x, 432.1x ,432.9x, 852.0x,                                                                                                                 |  |  |

|                                                               |                                      |  |  |
|---------------------------------------------------------------|--------------------------------------|--|--|
|                                                               | 852.2x, 852.4x, 853.0x)              |  |  |
| Iatrogenic post procedural cardiac complications              | 997.1                                |  |  |
| Pericardial Complication (hemopericardium, cardiac tamponade) | 423.0, 423.3                         |  |  |
| Pericardial tap                                               | 37.0 (only after the day of CABG)    |  |  |
| Cardiac complication                                          | Any of prior 3 rows of complications |  |  |
| <b>Additional Codes</b>                                       |                                      |  |  |
| One vessel bypass                                             | 36.11                                |  |  |
| Two vessel bypass                                             | 36.12                                |  |  |
| Three vessel bypass                                           | 36.13                                |  |  |
| Four vessel bypass                                            | 36.14                                |  |  |
| One internal mammary artery use                               | 36.15                                |  |  |
| Two internal                                                  | 36.16                                |  |  |

|                    |  |  |  |
|--------------------|--|--|--|
| mammary artery use |  |  |  |
|--------------------|--|--|--|

**Supplemental Table 2:** Completeness of match propensity matching using Parson’s digit-based greedy matching for all models. Only *P*-value and c-statistic for each match presented. All matched pairs are matched 1 cancer: 2 non-cancer. All propensity matching was done on variables of age, gender, race, income quartiles, insurance, total Elixhauser’s comorbidities, hospital size and geographic region, discharge weight and comorbidities of atrial fibrillation, hypertension, diabetes, anemia, chronic renal disease and coagulation disorder. In case of breast cancer and prostate cancer gender was not used.

| <b>Variable</b>      | <b>All-cancer<br/>(2003-2015,<br/>model 1) [c<br/>= 0.7]</b> | <b>All-cancer<br/>(2012-2015,<br/>model 2) [c<br/>= 0.7]</b> | <b>Breast<br/>Cancer<br/>(2012-2015)<br/>[c = 0.7]</b> | <b>Lung<br/>Cancer<br/>(2012-2015)<br/>[c = 0.7]</b> | <b>Colon<br/>Cancer<br/>(2012-2015)<br/>[c = 0.7]</b> | <b>Prostate<br/>Cancer<br/>(2012-2015)<br/>[c = 0.7]</b> | <b>Lymphoma<br/>(2012-2015)<br/>[c = 0.7]</b> |
|----------------------|--------------------------------------------------------------|--------------------------------------------------------------|--------------------------------------------------------|------------------------------------------------------|-------------------------------------------------------|----------------------------------------------------------|-----------------------------------------------|
| ≥ 65 years           | .33                                                          | .64                                                          | >.99                                                   | .96                                                  | >.99                                                  | >.99                                                     | .92                                           |
| Women                | .07                                                          | .60                                                          | -                                                      | .24                                                  | .59                                                   | -                                                        | .61                                           |
| Race                 | .23                                                          | .02                                                          | .13                                                    | >.99                                                 | .98                                                   | .99                                                      | .99                                           |
| Income quartiles     | .47                                                          | .60                                                          | .64                                                    | .76                                                  | .046                                                  | >.99                                                     | >.99                                          |
| Payment source       | .12                                                          | .29                                                          | >.99                                                   | .99                                                  | >.99                                                  | <.001                                                    | .005                                          |
| <b>Comorbidities</b> |                                                              |                                                              |                                                        |                                                      |                                                       |                                                          |                                               |
| Atrial Fibrillation  | .44                                                          | .12                                                          | .31                                                    | .59                                                  | .95                                                   | .73                                                      | .97                                           |
| Hypertension         | .06                                                          | .02                                                          | .97                                                    | .96                                                  | .26                                                   | .13                                                      | .94                                           |
| Diabetes             | .81                                                          | .59                                                          | .33                                                    | .97                                                  | .93                                                   | .92                                                      | >.99                                          |
| Anemia               | .48                                                          | .17                                                          | .52                                                    | >.99                                                 | >.99                                                  | .77                                                      | .97                                           |
| Chronic renal        | .89                                                          | .86                                                          | >.99                                                   | .59                                                  | .97                                                   | .81                                                      | .87                                           |

|                                  |     |     |      |      |      |      |      |
|----------------------------------|-----|-----|------|------|------|------|------|
| disease                          |     |     |      |      |      |      |      |
| Coagulation disorder             | .05 | .38 | >.99 | .92  | .34  | .46  | .79  |
| Total Elixhauser's comorbidities | .50 | .84 | >.99 | >.99 | >.99 | .23  | >.99 |
| Bed size                         | .22 | .98 | .35  | .16  | .48  | .93  | .15  |
| Geographic region                | .06 | .32 | >.99 | .88  | >.99 | >.99 | .41  |
| Discharge weight                 | .56 | .64 | .09  | .29  | .78  | .001 | .87  |

**Supplemental Table 3:** Propensity matched (1 cancer: 2 non-cancer, model 2) in-hospital and disposition outcome from the years 2012- September 2015 stratified by cancer and among those with Lymphoma. The propensity matching was done on variables of age, gender, race, income quartiles, insurance, total Elixhauser’s comorbidities, hospital size and geographic region, discharge weight and comorbidities of atrial fibrillation, hypertension, diabetes, anemia, chronic renal disease and coagulation disorder. C-statistic for propensity fit was 0.7 indicative of good match.

| <b>Variable</b>                                                        | <b>Cancer<br/>(n=48,115)</b> | <b>Non-Cancer<br/>(n=96,230)</b> | <b>P-value</b>   | <b>Lymphoma<br/>(n = 3,150)</b> | <b>Matched<br/>non-cancer<br/>(n = 6,290)</b> | <b>P-value</b>   |
|------------------------------------------------------------------------|------------------------------|----------------------------------|------------------|---------------------------------|-----------------------------------------------|------------------|
| <b>In-Hospital Outcomes (%)</b>                                        |                              |                                  |                  |                                 |                                               |                  |
| In-hospital mortality                                                  | .8                           | .9                               | .59              | 1.6                             | 1.1                                           | .37              |
| Major bleeding                                                         | 15.8                         | 14.3                             | .001             | 15.1                            | 13.4                                          | .34              |
| Ischemic Stroke                                                        | 1.6                          | 1.8                              | .18              | 2.1                             | 1.4                                           | .31              |
| Pulmonary complications                                                | 8.5                          | 9.4                              | .01              | 9.4                             | 11.6                                          | .15              |
| Cardiac complications                                                  | 10.9                         | 10.9                             | .92              | 10.3                            | 10.5                                          | .92              |
| Length of stay (median ± confidence interval, days)                    | 7.0±0.04                     | 7.1±0.04                         | .06 <sup>a</sup> | 7.1±0.2                         | 7.3±0.1                                       | .19 <sup>a</sup> |
| Total hospital costs (median ± confidence interval, US\$) <sup>b</sup> | 33,588±277                   | 33,636±242                       | .08 <sup>a</sup> | 34,681±584                      | 35,281±613                                    | .75 <sup>a</sup> |
|                                                                        |                              |                                  |                  |                                 |                                               |                  |

|                        |      |      |     |      |      |     |
|------------------------|------|------|-----|------|------|-----|
| <b>Disposition (%)</b> |      |      | .30 |      |      | .95 |
| Home                   | 38.0 | 39.2 |     | 40.6 | 39.9 |     |
| Short term hospital    | .6   | .6   |     | 1.2  | 1.3  |     |
| Skilled care facility  | 22.7 | 22.1 |     | 21.5 | 20.6 |     |
| Home health care       | 37.7 | 37.1 |     | 36.7 | 38.2 |     |

<sup>a</sup>Log transformed means were compared using Survey specific linear regression due to skewed nature of data

<sup>b</sup>Using HCUP cost-to-charge, wage index adjustment along with inflation adjustment

**Supplemental Table 4: In-hospital and disposition outcome of those undergoing CABG from the years 2012- September 2015 in metastatic cancer and those undergoing radiotherapy. Adjusted odds ratio of the outcomes presented where metastatic cancer is compared to non-metastatic cancer as well as those receiving radiation therapy is compared with those who did not receive radiation therapy. Adjustment made for age, gender, race, income quartiles, insurance, total Elixhauser’s comorbidities, hospital size and geographic region, and comorbidities of atrial fibrillation, hypertension, diabetes, anemia, chronic renal disease and coagulation disorder.**

| <b>Variable</b>                                                        | <b>Metastatic Cancer (n=850)</b> | <b>Adjusted odds ratio (OR (confidence interval); P-value)<sup>a</sup></b> | <b>Radiotherapy (n = 3,465)</b> | <b>Adjusted odds ratio (OR ± confidence interval; P-value)<sup>a</sup></b> |
|------------------------------------------------------------------------|----------------------------------|----------------------------------------------------------------------------|---------------------------------|----------------------------------------------------------------------------|
| <b>In-Hospital Outcomes (%)</b>                                        |                                  |                                                                            |                                 |                                                                            |
| In-hospital mortality                                                  | .6                               | .65 (.09 – 4.8); .68                                                       | .6                              | .72 (.26 – 2.01); .53                                                      |
| Major bleeding                                                         | 20.6                             | 1.58 (1.04 – 2.38); .03                                                    | 17.2                            | 1.10 (.88 – 1.37); .41                                                     |
| Ischemic Stroke                                                        | 2.4                              | .68 (.17 – 2.78); .59                                                      | 1.7                             | 1.17 (.64 – 2.13); .62                                                     |
| Pulmonary complications                                                | 11.2                             | 1.10 (.66 – 1.83); .71                                                     | 6.3                             | .76 (.55 – 1.05); .10                                                      |
| Cardiac complications                                                  | 7.1                              | .68 (.37 – 1.24); .21                                                      | 10.2                            | .97 (.72 – 1.29); .82                                                      |
| Length of stay (median ± confidence interval, days)                    | 8.1±.3                           | 1.2 (1.1 – 1.3); <.001                                                     | 6.8±.1                          | - .96 (-.94 – -.99); .001                                                  |
| Total hospital costs (median ± confidence interval, US\$) <sup>b</sup> | 37,707±1,752                     | 5,668 (2,733 – 8,603); .001                                                | 35,278±779                      | 522 (292 – 2,340); .01                                                     |
|                                                                        |                                  |                                                                            |                                 |                                                                            |
| <b>Disposition (%)<sup>c</sup></b>                                     |                                  | .004                                                                       |                                 | .30                                                                        |



|                       |      |  |      |  |
|-----------------------|------|--|------|--|
| Home                  | 30.6 |  | 36.4 |  |
| Short term hospital   | 2.4  |  | 2.9  |  |
| Skilled care facility | 25.8 |  | 22.9 |  |
| Home health care      | 41.2 |  | 37.8 |  |
|                       |      |  |      |  |

<sup>a</sup> Presented as  $\beta$  (confidence interval), *P*-value

<sup>b</sup> Using HCUP cost-to-charge, wage index adjustment along with inflation adjustment

<sup>c</sup> Only p-value presented since the subcategories are not separated into individual components

## References

1. CPI Inflation Calculator. Vol 2018. Online2018.
2. Houchens RL, Ross DN, Elixhauser A, Jiang J. Nationwide Inpatient Sample Redesign: Final Report. Vol 2018. Rockville, MD2014.
3. Marzolini S, Blanchard C, Alter DA, Grace SL, Oh PI. Delays in Referral and Enrolment Are Associated With Mitigated Benefits of Cardiac Rehabilitation After Coronary Artery Bypass Surgery. *Circ Cardiovasc Qual Outcomes*. 2015;8:608-620.
4. Barrett ML. 2015 Healthcare Cost and Utilization Project (HCUP) National Inpatient Sample: Change in Structure and Data Elements Caused by Transition to ICD-10-CM/PCS. Vol 2018. Online, Rockville, MD: U.S. Agency for Healthcare Research and Quality; 2017.
5. Parsons LS. Performing a 1: N case-control match on propensity score. *proceedings of the 29th Annual SAS users group international conference*: SAS Institute; 2004:165-129.
6. Bergstralh E, Kosanke J. GMATCH. Vol 20202007.
